# Supplementary material
Source: PubMed Central journal article supplement (PMC3447782)
Supplement: supp_blood-2012-03-415380_blood-2012-03-415380-1.pdf [file supp_blood-2012-03-415380_blood-2012-03-415380-1.pdf]

## SUPPLEMENTARY TABLES

**Table S1.** List of antibodies used in flow cytometry.

| Surface molecule             | Fluorochrome | Clone     | Manufacturer    |
|------------------------------|--------------|-----------|-----------------|
| <i>Anti-mouse antibodies</i> |              |           |                 |
| B220                         | PerCP        | RA3-6B2   | BD              |
| CD4                          | Alexa700     | L3T4      | eBioscience     |
| CD38                         | Alexa700     | 90        | eBioscience     |
| CD83                         | Biotin       | Michel19  | Biolegend       |
| CD86                         | Alexa488*    | GL1       | eBioscience     |
| CXCR4                        | PE           | 2B11      | eBioscience     |
| CXCR5                        | FITC         | 2G8       | BD              |
| FAS                          | PE-Cy7       | Jo2       | BD              |
| GL-7                         | FITC         | GL-7      | BD              |
| Igκ                          | FITC         | 187.1     | BD              |
| Igλ <sub>1-3</sub>           | FITC         | R26-46    | BD              |
| MHC II (I-Ab)                | FITC         | AF6-120.1 | BD              |
| <i>Anti-human antibodies</i> |              |           |                 |
| CCR6                         | PE           | 29-2L17   | Biolegend       |
| CD3                          | FITC         | UCHT1     | Beckman Coulter |
| CD19                         | PE-Cy7       | SJ25C1    | BD              |
| CD23                         | FITC         | EBVCS2    | eBioscience     |
| CD27                         | FITC         | M-T271    | BD              |
| CD38                         | PerCP-Cy5.5  | HIT2      | Biolegend       |
| CD44                         | FITC         | IM7       | eBioscience     |
| CD69                         | FITC         | FN50      | BD              |
| CD77                         | FITC         | 38-13     | AbD Serotec     |
| CD83                         | Biotin       | HB15e     | Biolegend       |
| CD86                         | Pacific Blue | IT2.2     | Biolegend       |
| CXCR4                        | PE           | 12G5      | Biolegend       |
| CXCR5                        | Alexa488     | RF8B2     | Biolegend       |
| IgD                          | FITC         | IA6-2     | BD              |
| IgD                          | V450         | IA6-2     | BD              |
| Igκ                          | FITC         | G20-193   | BD              |
| Igλ                          | FITC         | 1-155-2   | eBioscience     |
| MHC-II (HLA-DR)              | APC-Cy7      | L243      | BD              |
| <i>Secondary reagents</i>    |              |           |                 |
| Streptavidin                 | APC          | ---       | BD              |

\* conjugated to fluorochrome in our laboratory

**Table S2.** List of antibodies used in immunofluorescence microscopy.

| Surface molecule             | Fluorochrome | Clone             | Manufacturer             |
|------------------------------|--------------|-------------------|--------------------------|
| <i>Anti-mouse antibodies</i> |              |                   |                          |
| AID                          | Purified     | mAID-2            | eBioscience              |
| Bcl6 (N3)                    | Purified     | Rabbit polyclonal | Santa Cruz Biotechnology |
| Mouse IgH+L                  | Biotin       | Horse polyclonal  | Vector Laboratories      |
| <i>Anti-human antibodies</i> |              |                   |                          |
| AID                          | Purified     | mAID-2            | eBioscience              |
| CD23                         | Alexa488*    | 1B12              | Novocastra               |
| CD83                         | Purified     | 1H4b              | Abcam                    |
| CD86                         | APC          | IT2.2             | Biolegend                |
| CXCR4                        | PE           | 12G5              | Biolegend                |
| IgD                          | Biotin       | IA6-2             | BD                       |
| IgD                          | FITC         | IA6-2             | BD                       |
| <i>Secondary reagents</i>    |              |                   |                          |
| Streptavidin                 | Alexa647     | ---               | Invitrogen               |
| Rat IgG                      | Biotin       | Donkey polyclonal | Southern Biotech         |
| Streptavidin                 | Cy3          | ---               | Jackson Immunoresearch   |
| Streptavidin                 | Alexa647     | ---               | Invitrogen               |

\* conjugated to fluorochrome in our laboratory using Zenon kit (Invitrogen)

**Table S3.** Sequencing of V regions from human light and dark zone cells.

|           | No. of Sequences | Mutations/ Base Pair | Mutations/ V-region | p-value* | Replacement/ Silent Ratio | p-value* |
|-----------|------------------|----------------------|---------------------|----------|---------------------------|----------|
| LZ pooled | 37               | 0.0439               | 13.63               | 0.444    | 3.11                      | 0.397    |
| DZ pooled | 36               | 0.0496               | 14.60               |          | 2.73                      |          |
| LZ Pt. 1  | 13               | 0.0385               | 16.33               | 0.852    | 4.07                      | 0.088    |
| DZ Pt. 1  | 12               | 0.0407               | 12.00               |          | 3.13                      |          |
| LZ Pt. 2  | 15               | 0.0373               | 10.93               | 0.303    | 2.81                      | 0.820    |
| DZ Pt. 2  | 14               | 0.0501               | 14.71               |          | 2.68                      |          |
| LZ Pt. 3  | 9                | 0.0627               | 18.44               | 0.787    | 2.77                      | 0.556    |
| DZ Pt. 3  | 10               | 0.0588               | 17.30               |          | 2.53                      |          |

\* Student's T-test; Pt: patient

**Table S4.** Full list of genes included in each of the gene signatures constructed.

(Microsoft Excel spreadsheet)

**Table S5.** Overlap between selected gene sets from the GSEA database and the common human/mouse signatures light and dark zone signatures.

| Gene Sets                                            | Description                                                                                                         | Up in | Overlap analysis<br>( <i>Hs</i> and <i>Mm</i> combined) |                                 | GSEA analysis<br>(individually by species) |                                                     |                                                 |  |
|------------------------------------------------------|---------------------------------------------------------------------------------------------------------------------|-------|---------------------------------------------------------|---------------------------------|--------------------------------------------|-----------------------------------------------------|-------------------------------------------------|--|
|                                                      |                                                                                                                     |       | <i>k/K</i>                                              | p-value (overlap) <sup>§*</sup> | NES<br>( <i>Hs/Mm</i> )                    | Nominal<br>p-value<br>( <i>Hs/Mm</i> ) <sup>*</sup> | FDR<br>q-value<br>( <i>Hs/Mm</i> ) <sup>*</sup> |  |
| C2.CGP                                               |                                                                                                                     |       |                                                         |                                 |                                            |                                                     |                                                 |  |
| BASSO_CD40_SIGNALING_UP                              | Gene upregulated by CD40 signaling in Ramos cells (EBV-negative Burkitt's lymphoma)                                 | LZ    | 0.31                                                    | 0                               | 2.92/2.81                                  | 0/0                                                 | 0/0                                             |  |
| DIRMEIER_LMP1_RESPONSE_EARLY                         | Genes upregulated in B2264-19/3 cells (primary B lymphocytes) within 30-60 min after activation of LMP1             | LZ    | 0.39                                                    | 0                               | 2.77/2.67                                  | 0/0                                                 | 0/0                                             |  |
| SCHUHMACHER_MYC_TARGETS_UP                           | Genes upregulated in P493-6 cells (Burkitt's lymphoma) induced to express MYC                                       | LZ    | 0.19                                                    | 8.02E-13                        | 2.65/1.58                                  | 0/0.010                                             | 0/0.071                                         |  |
| BROCKE_APOPTOSIS_REVERSED_BY_IL6                     | Genes upregulated in INA-6 cells (multiple myeloma, MM) by re-addition of IL6 after its initial withdrawal for 12h. | LZ    | 0.11                                                    | 1.07E-12                        | 1.69/2.09                                  | 0/0                                                 | 0.044/0.001                                     |  |
| C3.TFT                                               |                                                                                                                     |       |                                                         |                                 |                                            |                                                     |                                                 |  |
| V\$NFKAPPAB_01                                       | Motif GGGAMTTYCC, matches annotation for NFKB/RELA                                                                  | LZ    | 0.10                                                    | 7.46E-08                        | 1.75/2.11                                  | 0/0                                                 | 0.025/0.001                                     |  |
| V\$SRF_01                                            | Motif ATGCCCATATATGGWNNT, matches annotation for SRF                                                                | LZ    | 0.11                                                    | 0.004                           | 1.81/1.48                                  | 0/0.009                                             | 0.011/0.199                                     |  |
| V\$STAT_01 (STAT6)                                   | Motif TTCCCGKAA; matches annotation for STAT6                                                                       | LZ    | 0.06                                                    | 0.005                           | 1.45/1.76                                  | 0.001/0                                             | 0.248/0.014                                     |  |
| C5.BP                                                |                                                                                                                     |       |                                                         |                                 |                                            |                                                     |                                                 |  |
| CELL_CYCLE_PROCESS                                   | Gene Ontology GO:0022402                                                                                            | DZ    | 0.18                                                    | 0                               | 2.89/2.10                                  | 0/0                                                 | 0/0.009                                         |  |
| MITOTIC_CELL_CYCLE                                   | Gene Ontology GO:0000278                                                                                            | DZ    | 0.20                                                    | 0                               | 2.75/2.05                                  | 0/0                                                 | 0/0.008                                         |  |
| MICROTUBULE_CYTOSKELETON_ORGANIZATION_AND_BIOGENESIS | Gene Ontology GO:0000226                                                                                            | DZ    | 0.24                                                    | 2.50E-06                        | 2.65/1.83                                  | 0/0.002                                             | 0/0.044                                         |  |
| CYTOKINESIS                                          | Gene Ontology GO:0000910                                                                                            | DZ    | 0.32                                                    | 7.46E-06                        | 2.48/2.04                                  | 0/0                                                 | 0/0.007                                         |  |

*k/K*: fraction of the total gene set contained within the common human/mouse signature; NES: Normalized enrichment score; FDR: False discovery rate; CGP: chemical and genetic perturbations (knowledge-based); TFT: transcription factor motifs (computational); BP: Gene Ontology, biological processes; Mm: *Mus musculus*; Hs: *Homo sapiens*; LZ: light zone; DZ: dark zone.

\* "0" indicates p-value below the minimum calculated by the algorithm.

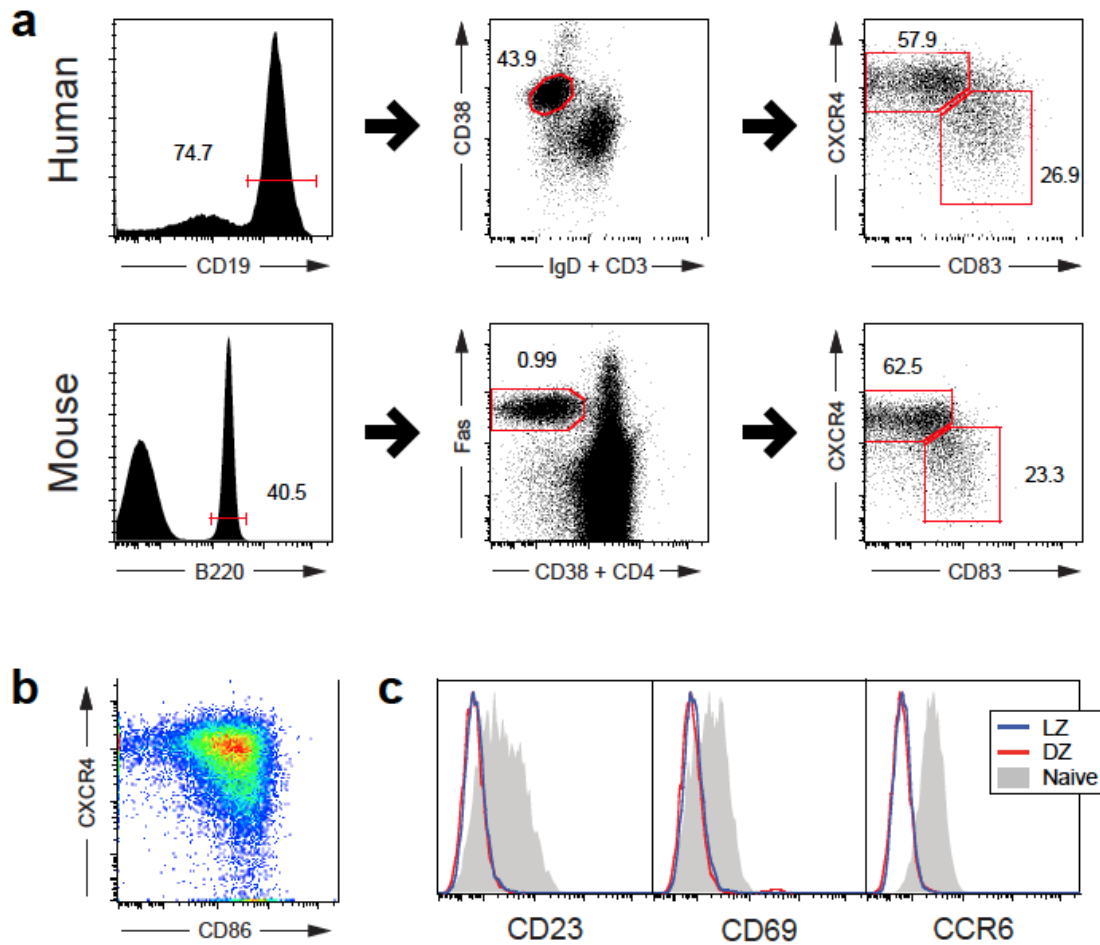

**Figure S1. Flow cytometry analysis of human and mouse light zone/dark zone B cells.** (A) Gating strategy for identifying LZ and DZ cells in GCs from human tonsil (top) and mouse lymph nodes and spleen (bottom). (B) Distribution of human GC B cells according to expression of CXCR4 and CD86. (C) Low expression of CD23, CD69, and CCR6 by human GC B cells.

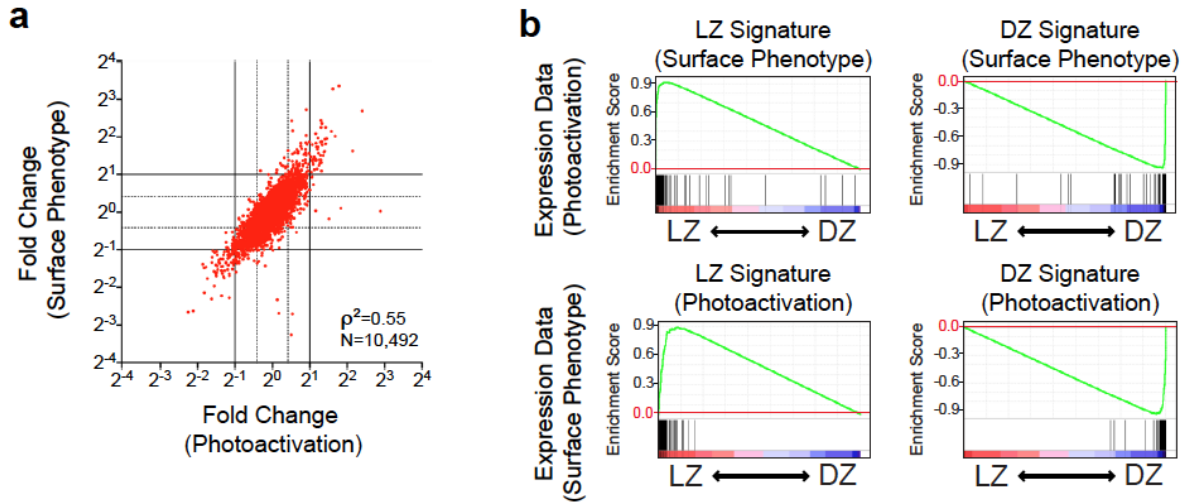

**Figure S2. Comparison of LZ/DZ profiles obtained by flow cytometry and *in situ* photoactivation.** (A) Correlation of fold differences between LZ and DZ cells sorted based on anatomical position (photoactivation, X-axis; data from Victora et al (2010)) and on expression of CXCR4 and CD83 (Surface Phenotype, Y-axis). To minimize noise from probes with trace or no signal, only the ~10 thousand probes with mean raw expression >100 in both datasets are plotted. (B) Gene set enrichment analysis of the expression of LZ and DZ gene signatures obtained by photoactivation or by sorting in the reciprocal datasets. Nominal and adjusted P-values and false discovery rates are all below the detection level (<0.001) for all comparisons.

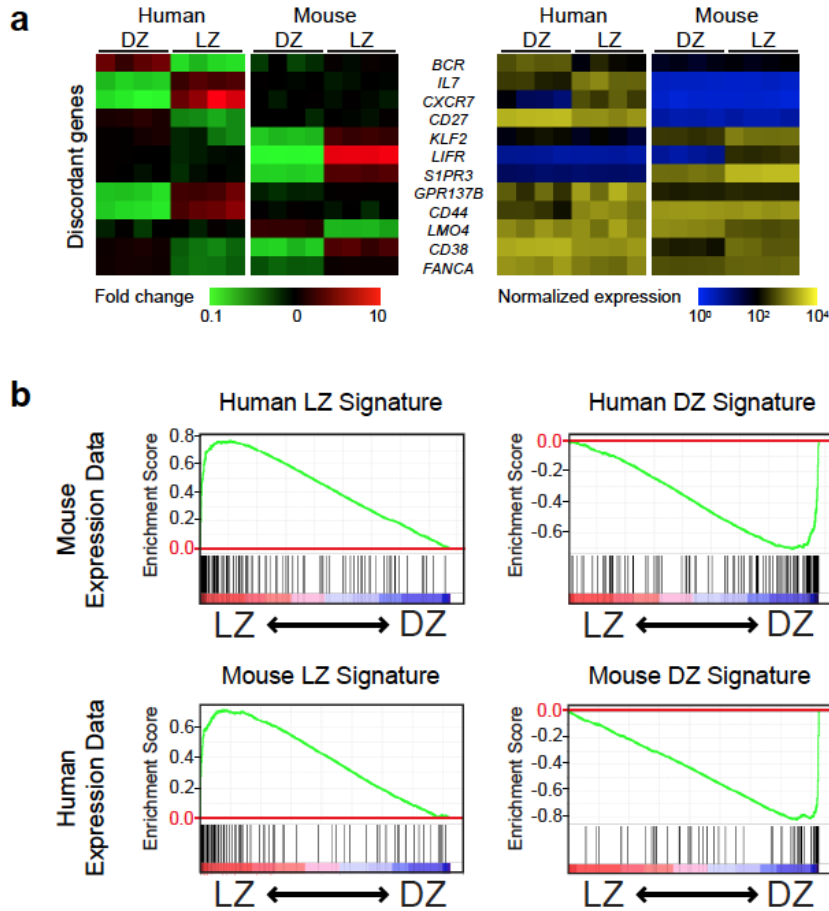

**Figure S3. A common set of genes distinguishes LZ and DZ B cells in mouse and human.** (A) *Right*: Heatmaps showing differential expression in LZ and DZ of genes whose changes in expression are not conserved between species, or do not follow the same trend in both mouse and human. Colors indicate fold change between one zone and the opposite zone from the same sample (human) or pool (mouse). *Left*: Absolute expression of the same genes in mouse and human. (B) Gene set enrichment analysis overlaying the mouse and human LZ and DZ gene signatures (as shown in Fig. 3) on datasets derived from the opposite species. Nominal and adjusted P-values and false discovery rate are all below the detection level ( $<0.001$ ) for all comparisons.

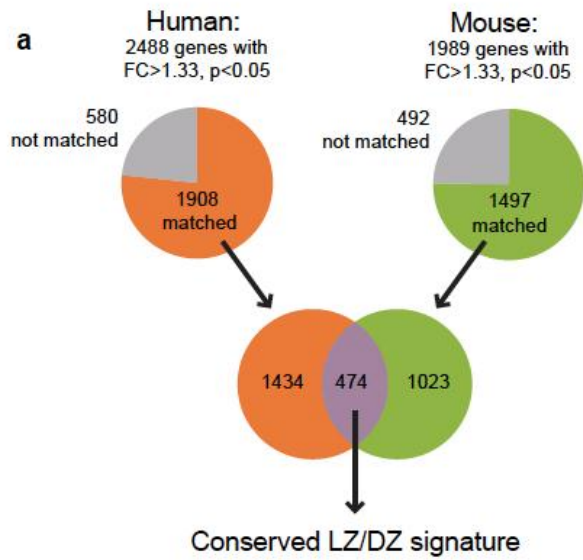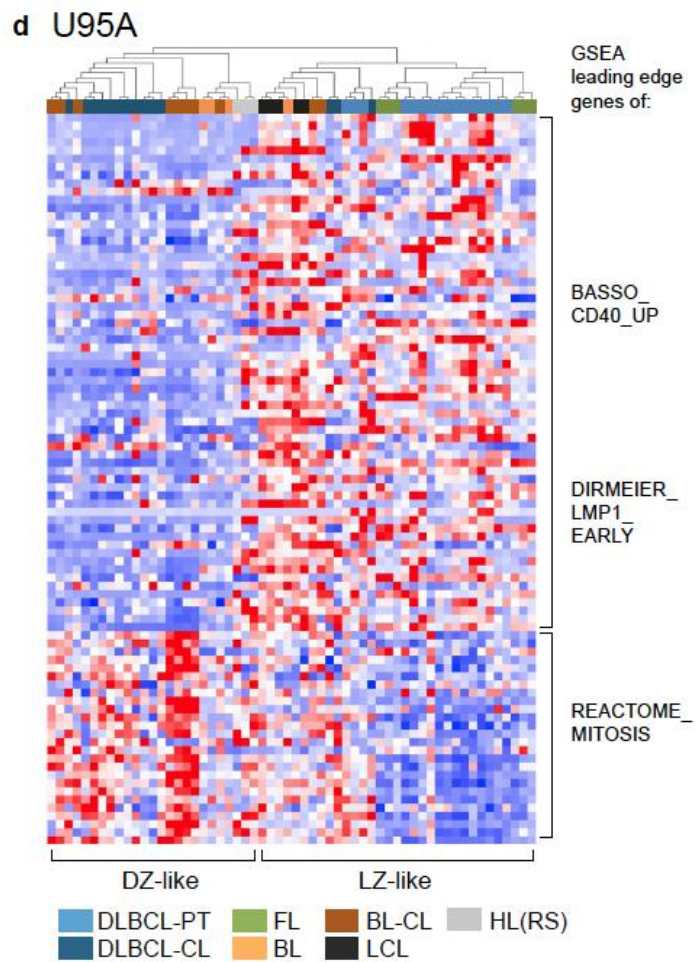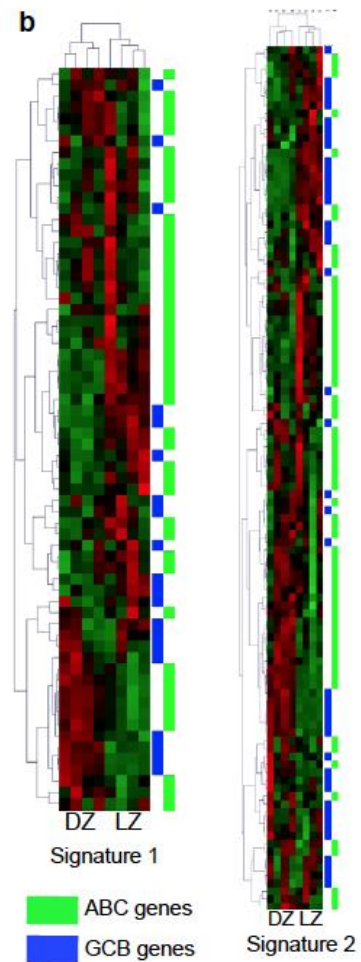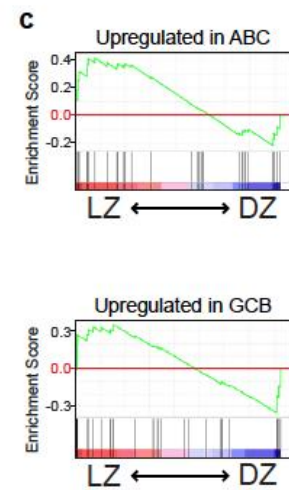

**Figure S4. Definition of a common LZ/DZ gene signature for mouse and human and its relationship to different B cell lymphomas.** (A) Genes in the low-stringency (1.33-fold cutoff) mouse and human LZ/DZ signatures were first matched to their homologues in the opposite species by Official Gene Symbol. Genes that could not be matched (the fraction in grey in the charts) were discarded. The overlap between the two gene sets thus obtained was defined as the common human/mouse signature. A smaller, more stringent version of this signature (1.5-fold cutoff) was used for clustering analysis. See Table S2 for the full signatures. (B) Expression pattern of ABC and GCB signature genes/probesets (Alizadeh et al., 2000; Rosenwald et al., 2002)) across human LZ and DZ samples. (C) GSEA enrichment plots for ABC or GCB gene signatures in LZ/DZ gene expression profiles (Normalized enrichment scores, 1.25 and 1.03, respectively. P-values, 0.15 and 0.41). (D) Hierarchical clustering of GC-derived B-NHL and various lymphoid cell lines based on the expression of genes in a “compound pathway signature.” In this case, the samples analyzed correspond to tumoral B cells purified from primary lymphoma cases by magnetic bead isolation (all samples have been previously reported in GSE2350, Gene Expression Omnibus database). Cases are color-coded. DLBCL, Diffuse Large B-cell Lymphoma. BL, Burkitt’s Lymphoma. FL, Follicular Lymphoma, HL, Hodgkin Lymphoma. (PT, primary tumors. CL, cell lines). LCL, lymphoblastoid cell lines. All Hodgkin lymphoma samples correspond to established cell lines.

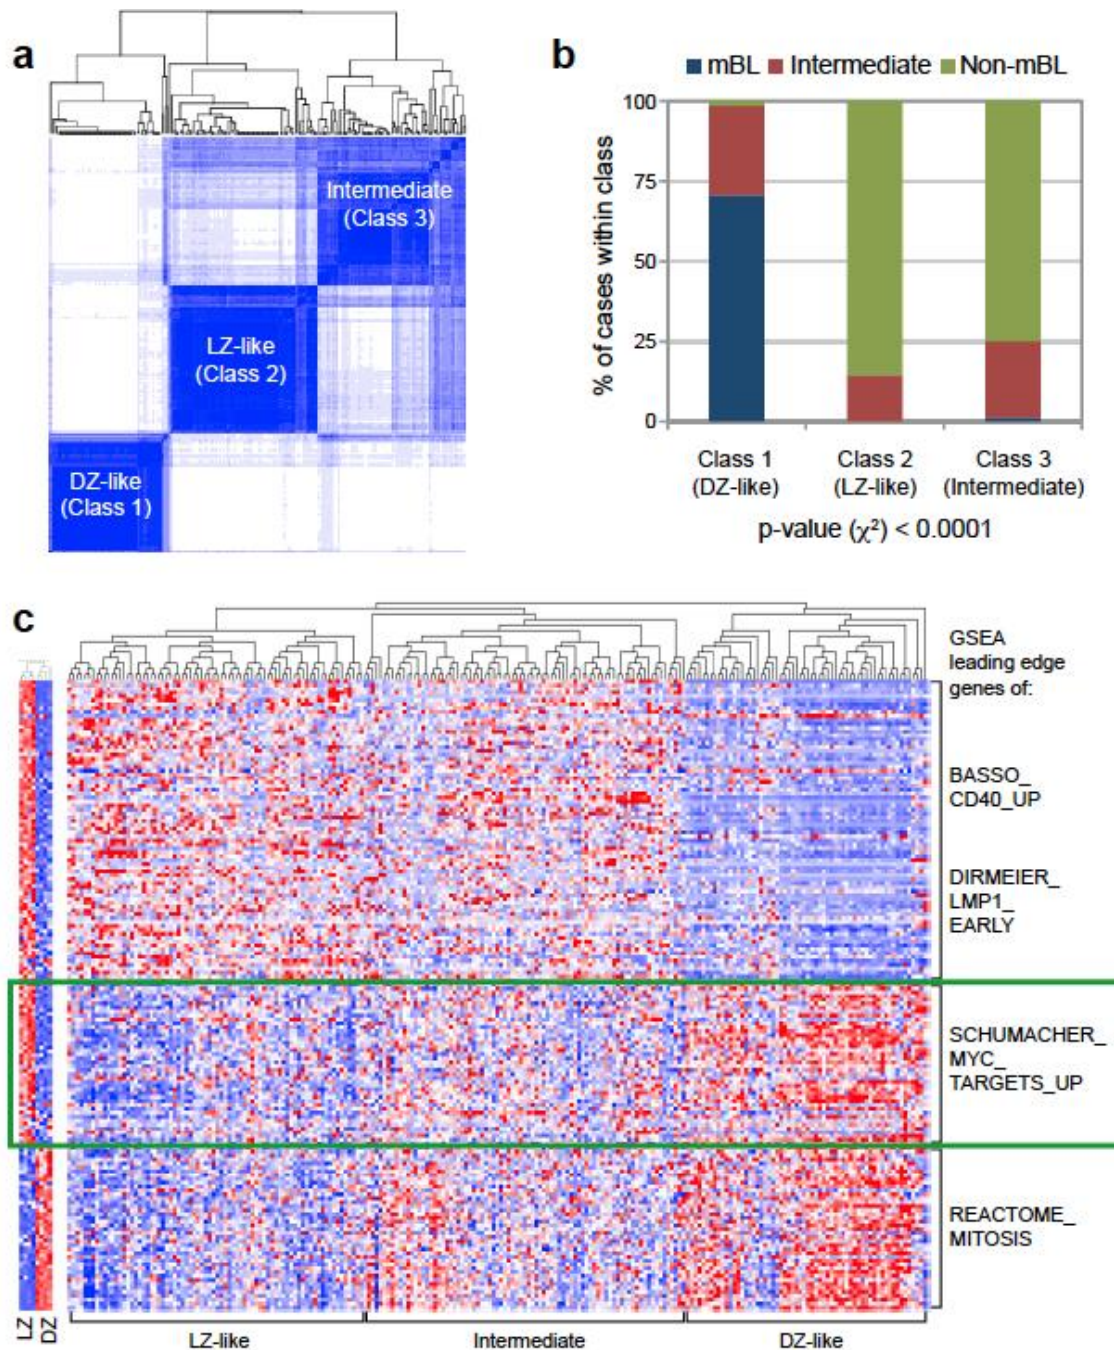

**Figure S5: Pathway-based Hierarchical Clustering identifies 3 subgroups of aggressive mature B-NHL based on their resemblance to LZ/DZ GC B-cells.**

(A) Consensus clustering (200 bootstraps) of the aggressive mature B-NHL case series described by Hummel et al (2006), according to the expression pattern of a “compound pathway signature” differentiating LZ and DZ GC B-cells. Shown is

the clustering image with  $k=3$  (no significant improvement of the CDF was observed with higher  $k$  values). (B) Distribution of molecular Burkitt Lymphomas (mBL) and non-molecular (non-mBL) cases, as defined by Hummel et al (2006), among the 3 different subgroups identified by the consensus clustering analysis depicted in (A). The p-value shown refers to the significance of the distribution of the three subclasses in Hummel et al (2006) (mBL, intermediate, non-mBL) among the three consensus clustering subgroups (Chi-squared test). (C) Hierarchical clustering of mature B-NHL lymphoma cases described by Hummel et al (2006) (see also Fig. 6). Clusters are highlighted for clarity, and are built based on the expression pattern of all genes included in the “compound pathway signature.” Because of the relevance of c-Myc-activated gene programs in the biology of Burkitt’s lymphoma and their enrichment in LZ GC B-cells, an additional signature (described in Table S3) was included in the analysis. Note the discordant behavior of this signature in normal DZ B cells and DZ-like aggressive B-NHL (= molecular BL).
